# Supplementary material for: ACKT: A Proposal for a Novel Score to Predict Prolonged Mechanical Ventilation after Surgical Treatment of Meningioma in Geriatric Patients
Source: MDPI journal article supplement (doi:10.3390/cancers13010098), 2020-12-31

Figure 2

2C

C.

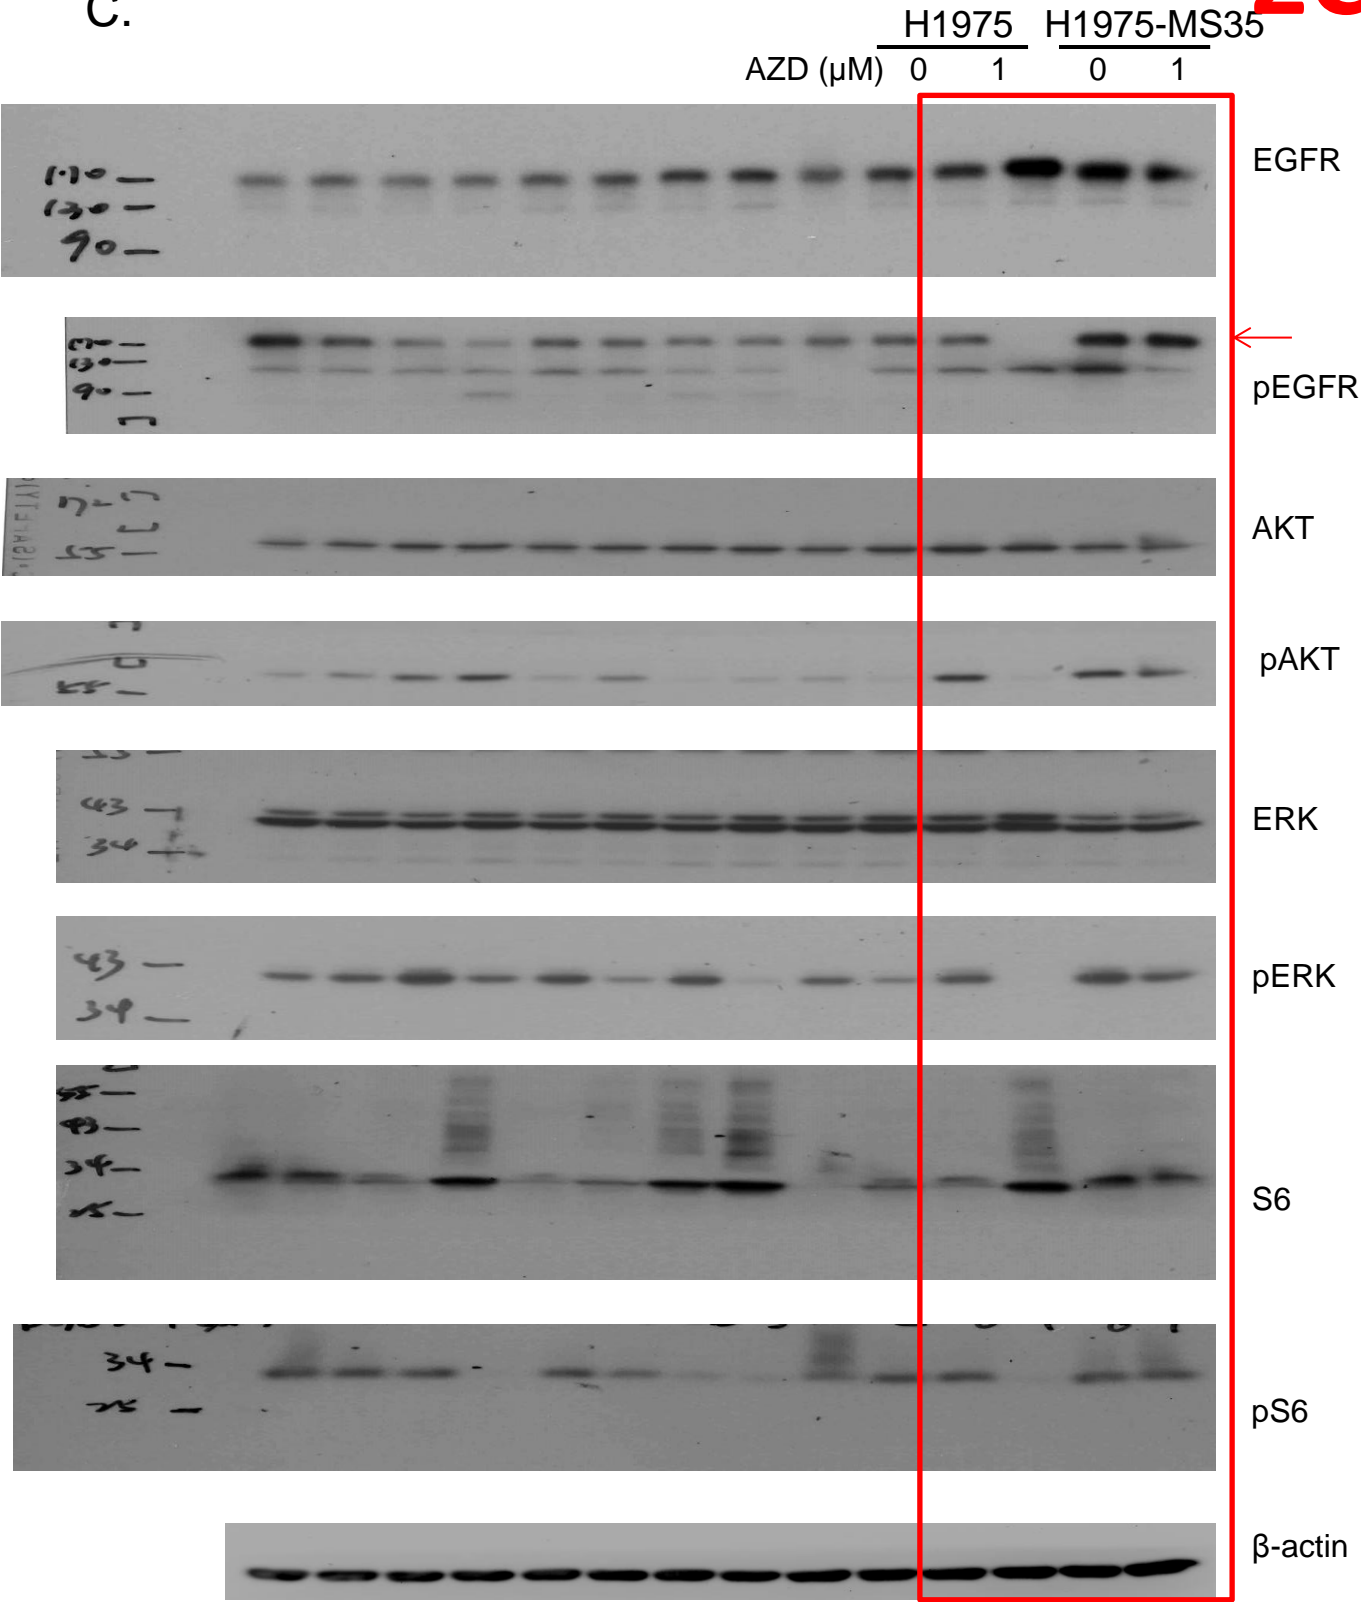

Figure 3

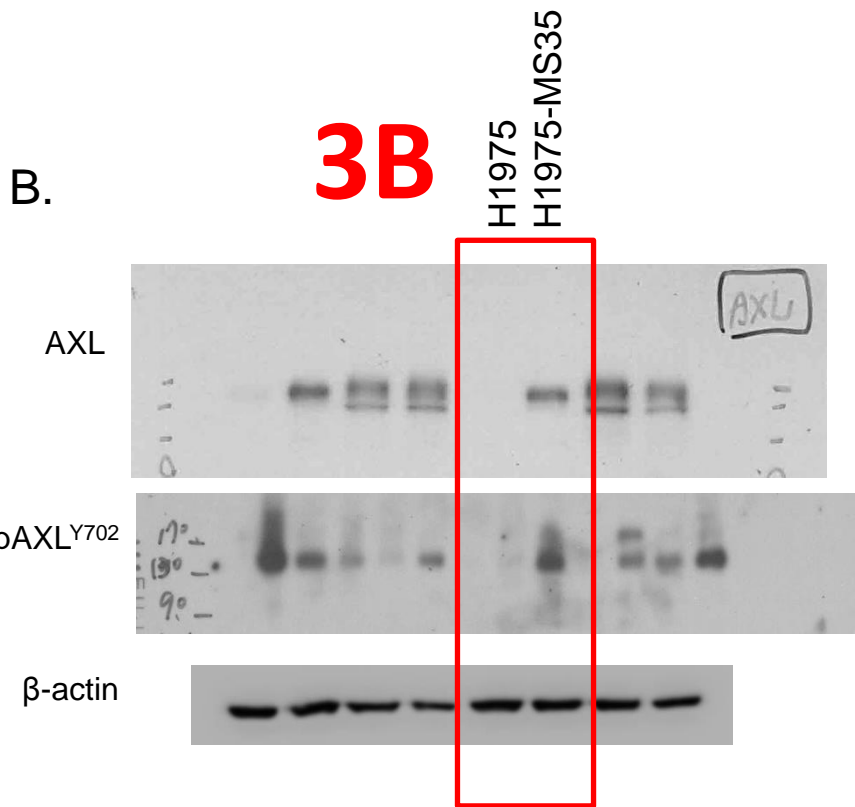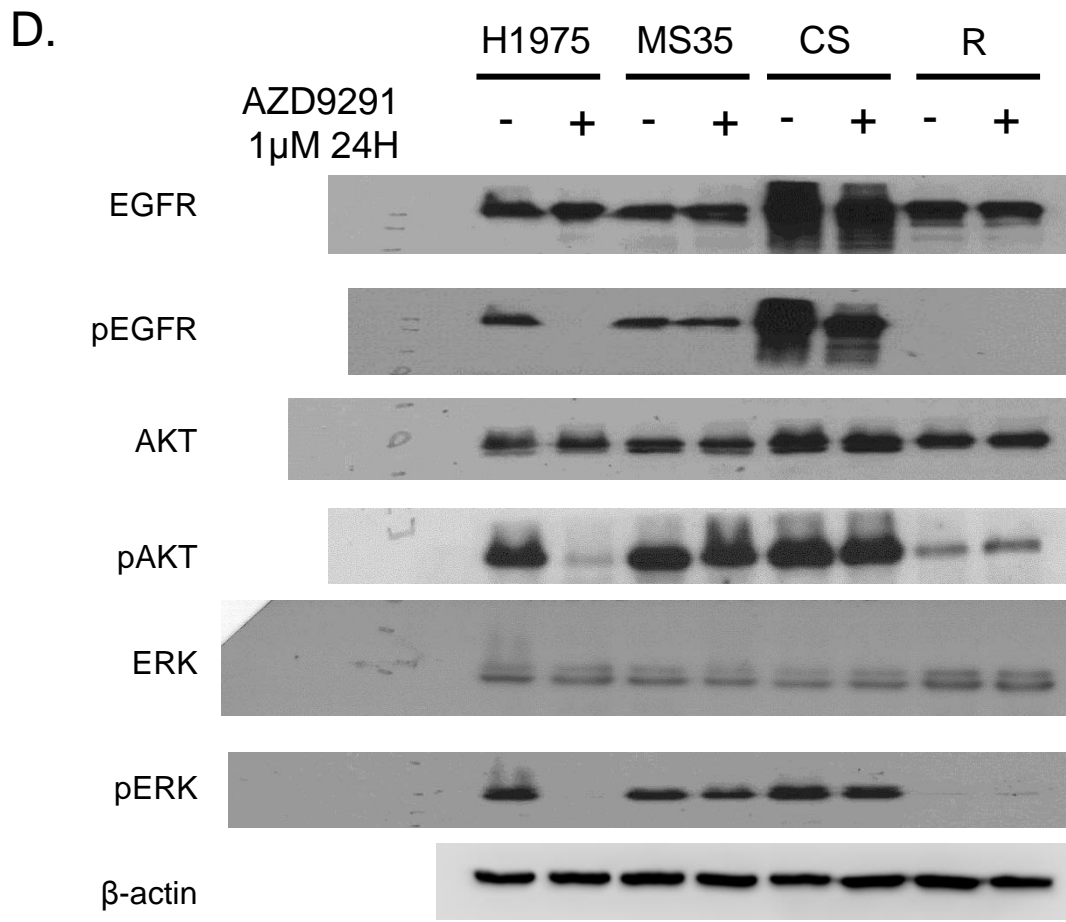

Figure 3

**3E**

E.

H1975 MS35 CS R

AXL

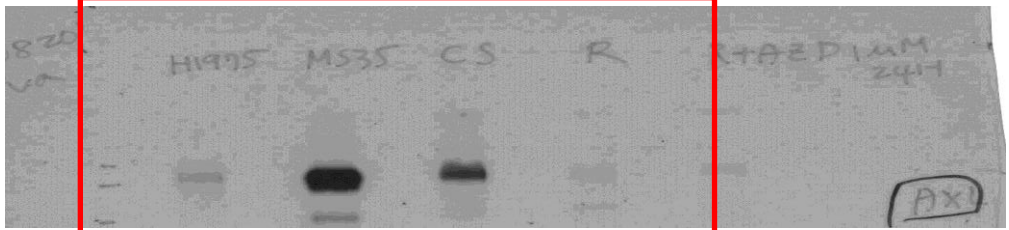

pAXL<sup>Y702</sup>

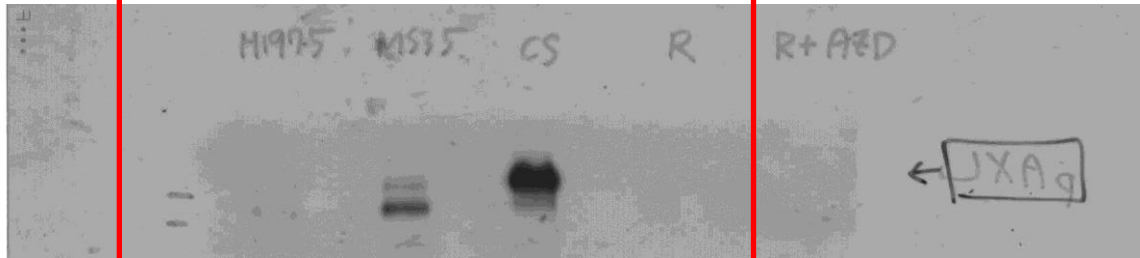

β-actin

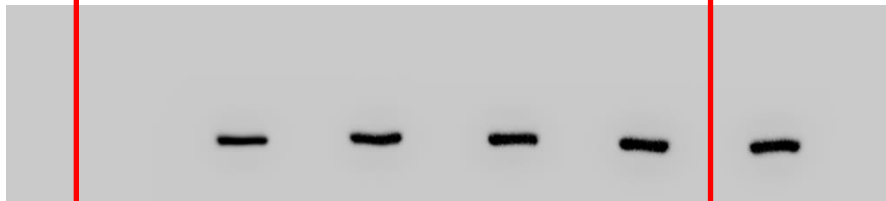

F.

H1975

pcDNA 3.1  
pcDNA 3.1-AXL

AXL

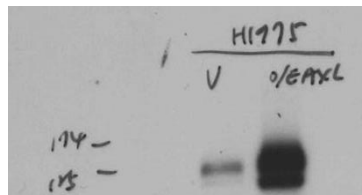

β-actin

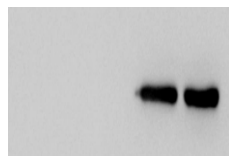

C

# 4C

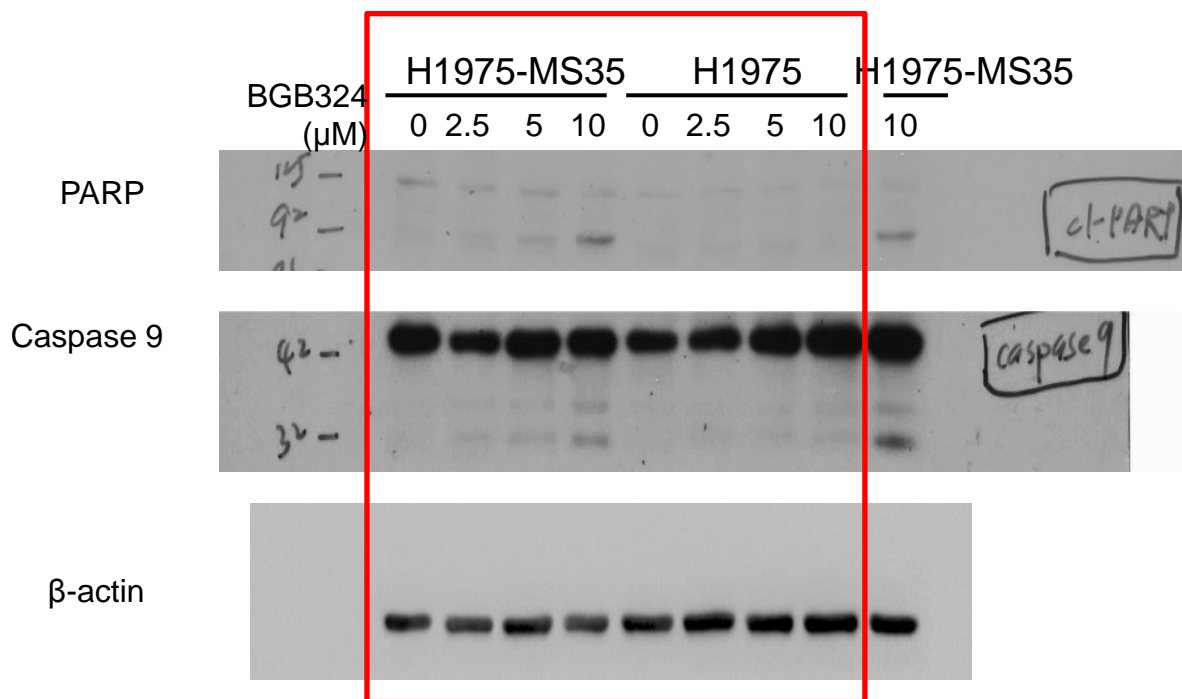

D

# 4D

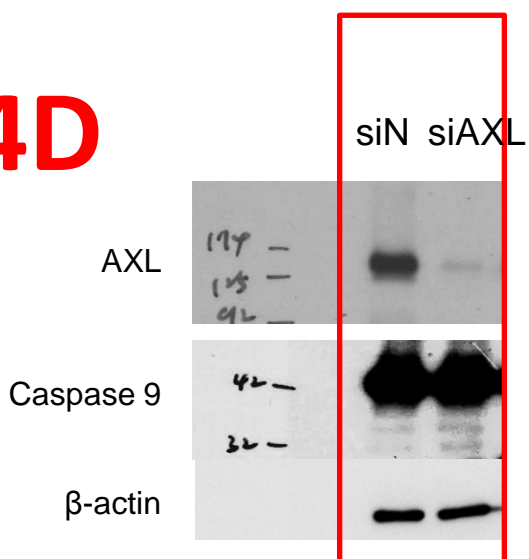

Supplementary Figure 1

C

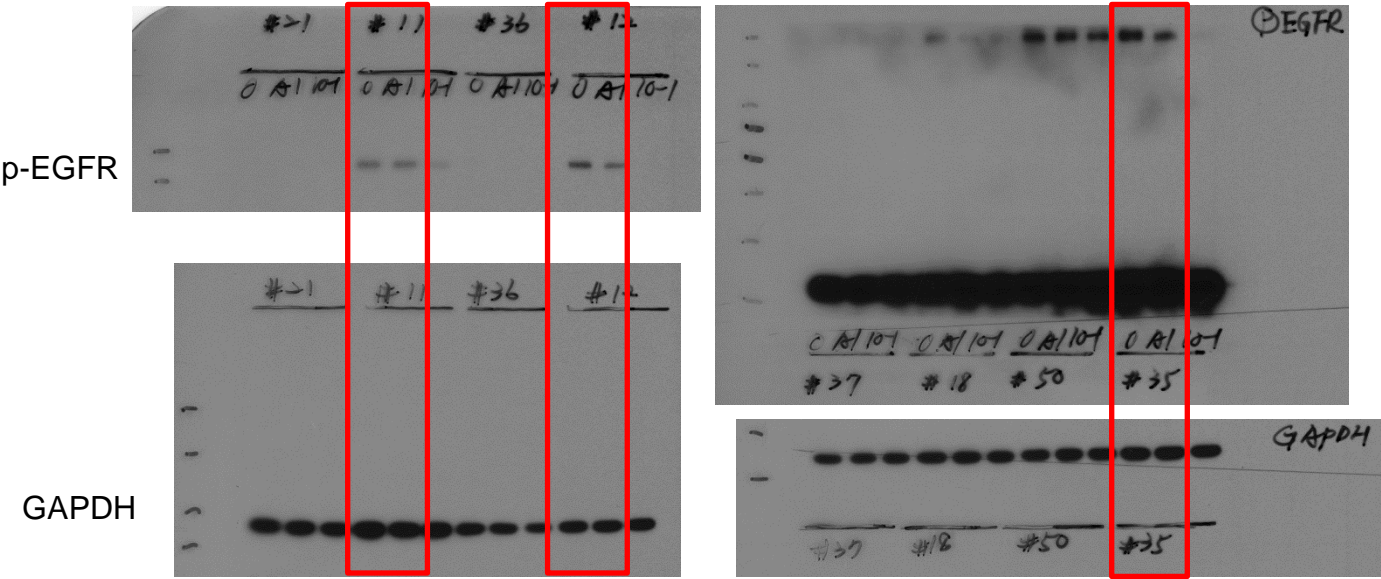

Supplement: s2 [file s2]
