# Supplementary material for: ACKT: A Proposal for a Novel Score to Predict Prolonged Mechanical Ventilation after Surgical Treatment of Meningioma in Geriatric Patients
Source: MDPI journal article supplement (doi:10.3390/cancers13010098), 2020-12-31
Supplement: s2 [file s2]

Archive with 4 entries (4 files):
- 1. 123120 Supplementary Table S1  Gene list.xlsx
- 2. 123120 Supplementary Table S2 Protein gene list.xlsx
- 3. cancers-979982-supplementary.pdf
- cancers-979982-original-images.pdf
