# Supplementary material for: ACKT: A Proposal for a Novel Score to Predict Prolonged Mechanical Ventilation after Surgical Treatment of Meningioma in Geriatric Patients
Source: MDPI journal article supplement (doi:10.3390/cancers13010098), 2020-12-31
Supplement: s2 [file s2 › 1. 123120 Supplementary Table S1 Gene list.xlsx]

## Sheet: Supp Tab 1 DEG
Supplementary Table 1. List of genes differentially expressed in the H1975-MS35 cells
gene_id	Protein stable ID	Gene description	Gene name	NCBI gene ID	Gene type	log 2 ratio (H1975 /H1975 MS-35)	p_value
Up-regulated genes in H1975-MS35 cells
ENSG00000138135	ENSP00000360918	cholesterol 25-hydroxylase [Source:HGNC Symbol;Acc:HGNC:1907]	CH25H	9023	protein_coding	-17.7387	0.00035
ENSG00000174469	ENSP00000491690	contactin associated protein-like 2 [Source:HGNC Symbol;Acc:HGNC:13830]	CNTNAP2	26047	protein_coding	-16.5782	5e-05
ENSG00000118181	-	ribosomal protein S25 [Source:HGNC Symbol;Acc:HGNC:10413]	RPS25	6230	protein_coding	-16.3305	0.04725
ENSG00000251141	-	-	AC093297.2	-	antisense	-16.0045	0.01645
ENSG00000239775	-	-	AC017116.1	-	sense_overlapping	-16.0023	0.02435
ENSG00000182021	-	-	AL591379.1	-	transcribed_unprocessed_pseudogene	-15.8255	0.03045
ENSG00000251381	-	long intergenic non-protein coding RNA 958 [Source:HGNC Symbol;Acc:HGNC:48671]	LINC00958	100506305	lincRNA	-15.6956	0.011
ENSG00000241469	-	long intergenic non-protein coding RNA 635 [Source:HGNC Symbol;Acc:HGNC:27184]	LINC00635	151658	lincRNA	-15.6339	0.00015
ENSG00000184613	ENSP00000378866	neural EGFL like 2 [Source:HGNC Symbol;Acc:HGNC:7751]	NELL2	4753	protein_coding	-15.5839	0.00025
ENSG00000163687	-	deoxyribonuclease 1 like 3 [Source:HGNC Symbol;Acc:HGNC:2959]	DNASE1L3	1776	protein_coding	-15.486	0.02215
ENSG00000104313	ENSP00000373392	EYA transcriptional coactivator and phosphatase 1 [Source:HGNC Symbol;Acc:HGNC:3519]	EYA1	2138	protein_coding	-15.4457	0.01035
ENSG00000249816	-	long intergenic non-protein coding RNA 964 [Source:HGNC Symbol;Acc:HGNC:27226]	LINC00964	157381	lincRNA	-15.4407	0.0122
ENSG00000250305	ENSP00000443288	KIAA1456 [Source:HGNC Symbol;Acc:HGNC:26725]	KIAA1456	57604	protein_coding	-15.4217	0.00635
ENSG00000127324	-	tetraspanin 8 [Source:HGNC Symbol;Acc:HGNC:11855]	TSPAN8	7103	protein_coding	-15.3749	0.0257
ENSG00000072818	ENSP00000460054	ArfGAP with coiled-coil, ankyrin repeat and PH domains 1 [Source:HGNC Symbol;Acc:HGNC:16467]	ACAP1	9744	protein_coding	-7.42666	0.0408
ENSG00000124749	ENSP00000444384	collagen type XXI alpha 1 chain [Source:HGNC Symbol;Acc:HGNC:17025]	COL21A1	81578	protein_coding	-5.18185	0.04305
ENSG00000130822	-	pregnancy up-regulated nonubiquitous CaM kinase [Source:HGNC Symbol;Acc:HGNC:13415]	PNCK	139728	protein_coding	-4.38994	0.0115
ENSG00000170324	-	FERM and PDZ domain containing 2 [Source:HGNC Symbol;Acc:HGNC:28572]	FRMPD2	143162	protein_coding	-4.28874	0.0171
ENSG00000204256	ENSP00000409145	bromodomain containing 2 [Source:HGNC Symbol;Acc:HGNC:1103]	BRD2	6046	protein_coding	-4.02044	0.01465
ENSG00000188153	ENSP00000424845	collagen type IV alpha 5 chain [Source:HGNC Symbol;Acc:HGNC:2207]	COL4A5	1287	protein_coding	-3.91455	0.00315
ENSG00000130226	ENSP00000477855	dipeptidyl peptidase like 6 [Source:HGNC Symbol;Acc:HGNC:3010]	DPP6	1804	protein_coding	-3.86245	0.0161
ENSG00000147606	ENSP00000482549	solute carrier family 26 member 7 [Source:HGNC Symbol;Acc:HGNC:14467]	SLC26A7	115111	protein_coding	-3.83217	0.04205
ENSG00000120093	-	homeobox B3 [Source:HGNC Symbol;Acc:HGNC:5114]	HOXB3	3213	protein_coding	-3.78191	0.04125
ENSG00000264230	ENSP00000478808	annexin A8 like 1 [Source:HGNC Symbol;Acc:HGNC:23334]	ANXA8L1	728113	protein_coding	-3.71212	0.0283
ENSG00000137745	ENSP00000482883	matrix metallopeptidase 13 [Source:HGNC Symbol;Acc:HGNC:7159]	MMP13	4322	protein_coding	-3.66607	0.00705
ENSG00000055163	-	cytoplasmic FMR1 interacting protein 2 [Source:HGNC Symbol;Acc:HGNC:13760]	CYFIP2	26999	protein_coding	-3.53115	0.0016
ENSG00000275832	-	Rho GTPase activating protein 23 [Source:HGNC Symbol;Acc:HGNC:29293]	ARHGAP23	57636	protein_coding	-3.35558	0.02695
ENSG00000154556	ENSP00000397482	sorbin and SH3 domain containing 2 [Source:HGNC Symbol;Acc:HGNC:24098]	SORBS2	8470	protein_coding	-3.34461	5e-05
ENSG00000109339	ENSP00000378590	mitogen-activated protein kinase 10 [Source:HGNC Symbol;Acc:HGNC:6872]	MAPK10	5602	protein_coding	-3.32334	0.00025
ENSG00000165495	-	PBX/knotted 1 homeobox 2 [Source:HGNC Symbol;Acc:HGNC:16714]	PKNOX2	63876	protein_coding	-3.31795	0.03905
ENSG00000265190	ENSP00000478026	annexin A8 [Source:HGNC Symbol;Acc:HGNC:546]	ANXA8	107984085	protein_coding	-3.0845	0.00205
ENSG00000002079	-	myosin heavy chain 16 pseudogene [Source:HGNC Symbol;Acc:HGNC:31038]	MYH16	-	transcribed_unitary_pseudogene	-3.05475	0.00235
ENSG00000166592	ENSP00000388744	RRAD, Ras related glycolysis inhibitor and calcium channel regulator [Source:HGNC Symbol;Acc:HGNC:10446]	RRAD	6236	protein_coding	-3.01551	0.03615
ENSG00000065618	-	collagen type XVII alpha 1 chain [Source:HGNC Symbol;Acc:HGNC:2194]	COL17A1	1308	protein_coding	-2.97517	0.0009
ENSG00000167755	ENSP00000375684	kallikrein related peptidase 6 [Source:HGNC Symbol;Acc:HGNC:6367]	KLK6	5653	protein_coding	-2.97249	0.0116
ENSG00000006747	-	scinderin [Source:HGNC Symbol;Acc:HGNC:21695]	SCIN	85477	protein_coding	-2.90427	0.01845
ENSG00000114270	-	collagen type VII alpha 1 chain [Source:HGNC Symbol;Acc:HGNC:2214]	COL7A1	1294	protein_coding	-2.86337	0.00045
ENSG00000089356	ENSP00000339499	FXYD domain containing ion transport regulator 3 [Source:HGNC Symbol;Acc:HGNC:4027]	FXYD3	5349	protein_coding	-2.85771	0.01245
ENSG00000137648	ENSP00000478147	transmembrane protease, serine 4 [Source:HGNC Symbol;Acc:HGNC:11878]	TMPRSS4	56649	protein_coding	-2.80406	0.016
ENSG00000196754	ENSP00000357696	S100 calcium binding protein A2 [Source:HGNC Symbol;Acc:HGNC:10492]	S100A2	6273	protein_coding	-2.79056	0.02495
ENSG00000145020	-	aminomethyltransferase [Source:HGNC Symbol;Acc:HGNC:473]	AMT	275	protein_coding	-2.71015	0.00085
ENSG00000073282	-	tumor protein p63 [Source:HGNC Symbol;Acc:HGNC:15979]	TP63	8626	protein_coding	-2.48775	0.0108
ENSG00000135842	-	family with sequence similarity 129 member A [Source:HGNC Symbol;Acc:HGNC:16784]	FAM129A	116496	protein_coding	-2.44946	0.0208
ENSG00000068831	ENSP00000389068	RAS guanyl releasing protein 2 [Source:HGNC Symbol;Acc:HGNC:9879]	RASGRP2	10235	protein_coding	-2.3097	0.0224
ENSG00000196189	ENSP00000357269	semaphorin 4A [Source:HGNC Symbol;Acc:HGNC:10729]	SEMA4A	64218	protein_coding	-2.28429	0.02615
ENSG00000167601	ENSP00000471497	AXL receptor tyrosine kinase [Source:HGNC Symbol;Acc:HGNC:905]	AXL	558	protein_coding	-2.2282	0.04175
ENSG00000086570	ENSP00000261800	FAT atypical cadherin 2 [Source:HGNC Symbol;Acc:HGNC:3596]	FAT2	2196	protein_coding	-2.17336	0.0495
ENSG00000221968	-	fatty acid desaturase 3 [Source:HGNC Symbol;Acc:HGNC:3576]	FADS3	3995	protein_coding	-2.15661	0.04765
ENSG00000186642	ENSP00000411657	phosphodiesterase 2A [Source:HGNC Symbol;Acc:HGNC:8777]	PDE2A	5138	protein_coding	-2.15483	0.0368
ENSG00000070669	ENSP00000175506	asparagine synthetase (glutamine-hydrolyzing) [Source:HGNC Symbol;Acc:HGNC:753]	ASNS	440	protein_coding	-2.0634	0.006
ENSG00000134955	-	solute carrier family 37 member 2 [Source:HGNC Symbol;Acc:HGNC:20644]	SLC37A2	219855	protein_coding	-2.05217	0.04505
ENSG00000110400	-	nectin cell adhesion molecule 1 [Source:HGNC Symbol;Acc:HGNC:9706]	NECTIN1	5818	protein_coding	-1.86223	0.02815
ENSG00000106366	ENSP00000223095	serpin family E member 1 [Source:HGNC Symbol;Acc:HGNC:8583]	SERPINE1	5054	protein_coding	-1.84895	0.03455
ENSG00000164715	-	lemur tyrosine kinase 2 [Source:HGNC Symbol;Acc:HGNC:17880]	LMTK2	22853	protein_coding	-1.81678	0.03075
ENSG00000158321	ENSP00000478134	AUTS2, activator of transcription and developmental regulator [Source:HGNC Symbol;Acc:HGNC:14262]	AUTS2	26053	protein_coding	-1.77968	0.0291
ENSG00000076356	-	plexin A2 [Source:HGNC Symbol;Acc:HGNC:9100]	PLXNA2	5362	protein_coding	-1.73675	0.0461
ENSG00000142798	-	heparan sulfate proteoglycan 2 [Source:HGNC Symbol;Acc:HGNC:5273]	HSPG2	3339	protein_coding	-1.72036	0.0283
ENSG00000205356	-	tectonin beta-propeller repeat containing 1 [Source:HGNC Symbol;Acc:HGNC:22214]	TECPR1	25851	protein_coding	-1.71744	0.0343
ENSG00000197343	ENSP00000486262	zinc finger protein 655 [Source:HGNC Symbol;Acc:HGNC:30899]	ZNF655	79027	protein_coding	-1.65209	0.0305
ENSG00000142910	ENSP00000445392	tubulointerstitial nephritis antigen like 1 [Source:HGNC Symbol;Acc:HGNC:19168]	TINAGL1	64129	protein_coding	-1.59755	0.0399
ENSG00000132470	ENSP00000462494	integrin subunit beta 4 [Source:HGNC Symbol;Acc:HGNC:6158]	ITGB4	3691	protein_coding	-1.55684	0.038
Down-regulated genes in H1975-MS35 cells
ENSG00000079819	ENSP00000486691	erythrocyte membrane protein band 4.1 like 2 [Source:HGNC Symbol;Acc:HGNC:3379]	EPB41L2	2037	protein_coding	1.37833	0.0464
ENSG00000156113	ENSP00000346321	potassium calcium-activated channel subfamily M alpha 1 [Source:HGNC Symbol;Acc:HGNC:6284]	KCNMA1	3778	protein_coding	1.76383	0.00285
ENSG00000035862	ENSP00000464930	TIMP metallopeptidase inhibitor 2 [Source:HGNC Symbol;Acc:HGNC:11821]	TIMP2	7077	protein_coding	1.85259	0.03195
ENSG00000134802	ENSP00000434371	solute carrier family 43 member 3 [Source:HGNC Symbol;Acc:HGNC:17466]	SLC43A3	29015	protein_coding	2.0054	0.0185
ENSG00000213918	ENSP00000461153	deoxyribonuclease 1 [Source:HGNC Symbol;Acc:HGNC:2956]	DNASE1	1773	protein_coding	2.05338	0.0245
ENSG00000214049	-	urothelial cancer associated 1 (non-protein coding) [Source:HGNC Symbol;Acc:HGNC:37126]	UCA1	652995	processed_transcript	2.15228	0.0083
ENSG00000111961	ENSP00000479998	SAM and SH3 domain containing 1 [Source:HGNC Symbol;Acc:HGNC:19182]	SASH1	23328	protein_coding	2.17061	0.0335
ENSG00000065717	ENSP00000392869	transducin like enhancer of split 2 [Source:HGNC Symbol;Acc:HGNC:11838]	TLE2	7089	protein_coding	2.17118	0.0368
ENSG00000166165	-	creatine kinase B [Source:HGNC Symbol;Acc:HGNC:1991]	CKB	1152	protein_coding	2.23326	0.03785
ENSG00000103196	ENSP00000463171	cysteine rich secretory protein LCCL domain containing 2 [Source:HGNC Symbol;Acc:HGNC:25248]	CRISPLD2	83716	protein_coding	2.23778	0.03895
ENSG00000135362	-	proline rich 5 like [Source:HGNC Symbol;Acc:HGNC:25878]	PRR5L	79899	protein_coding	2.23919	0.0403
ENSG00000128510	ENSP00000412947	carboxypeptidase A4 [Source:HGNC Symbol;Acc:HGNC:15740]	CPA4	51200	protein_coding	2.24991	0.02795
ENSG00000100968	-	nuclear factor of activated T-cells 4 [Source:HGNC Symbol;Acc:HGNC:7778]	NFATC4	4776	protein_coding	2.28042	0.02885
ENSG00000184828	ENSP00000468152	zinc finger and BTB domain containing 7C [Source:HGNC Symbol;Acc:HGNC:31700]	ZBTB7C	201501	protein_coding	2.32521	0.0077
ENSG00000117525	-	coagulation factor III, tissue factor [Source:HGNC Symbol;Acc:HGNC:3541]	F3	2152	protein_coding	2.32748	0.0346
ENSG00000079263	ENSP00000398210	SP140 nuclear body protein [Source:HGNC Symbol;Acc:HGNC:17133]	SP140	11262	protein_coding	2.41987	0.0353
ENSG00000102879	-	coronin 1A [Source:HGNC Symbol;Acc:HGNC:2252]	CORO1A	11151	protein_coding	2.50625	0.0433
ENSG00000104870	ENSP00000471232	Fc fragment of IgG receptor and transporter [Source:HGNC Symbol;Acc:HGNC:3621]	FCGRT	2217	protein_coding	2.55555	0.04805
ENSG00000166741	-	nicotinamide N-methyltransferase [Source:HGNC Symbol;Acc:HGNC:7861]	NNMT	4837	protein_coding	2.57939	0.0453
ENSG00000159167	ENSP00000427932	stanniocalcin 1 [Source:HGNC Symbol;Acc:HGNC:11373]	STC1	6781	protein_coding	2.71225	0.0307
ENSG00000131018	ENSP00000390975	spectrin repeat containing nuclear envelope protein 1 [Source:HGNC Symbol;Acc:HGNC:17089]	SYNE1	23345	protein_coding	3.07587	0.0013
ENSG00000128242	ENSP00000343234	galactose-3-O-sulfotransferase 1 [Source:HGNC Symbol;Acc:HGNC:24240]	GAL3ST1	9514	protein_coding	3.10267	0.0075
ENSG00000064042	-	LIM and calponin homology domains 1 [Source:HGNC Symbol;Acc:HGNC:29191]	LIMCH1	22998	protein_coding	3.10944	0.0098
ENSG00000124882	-	epiregulin [Source:HGNC Symbol;Acc:HGNC:3443]	EREG	2069	protein_coding	3.17533	0.02515
ENSG00000134827	-	transcobalamin 1 [Source:HGNC Symbol;Acc:HGNC:11652]	TCN1	6947	protein_coding	3.1831	0.0347
ENSG00000138395	-	cyclin dependent kinase 15 [Source:HGNC Symbol;Acc:HGNC:14434]	CDK15	65061	protein_coding	3.26047	0.0068
ENSG00000111181	ENSP00000380464	solute carrier family 6 member 12 [Source:HGNC Symbol;Acc:HGNC:11045]	SLC6A12	6539	protein_coding	3.31117	0.02065
ENSG00000182985	ENSP00000483648	cell adhesion molecule 1 [Source:HGNC Symbol;Acc:HGNC:5951]	CADM1	23705	protein_coding	3.40326	0.01685
ENSG00000182568	ENSP00000394520	SATB homeobox 1 [Source:HGNC Symbol;Acc:HGNC:10541]	SATB1	6304	protein_coding	3.41966	0.0416
ENSG00000176406	ENSP00000342051	regulating synaptic membrane exocytosis 2 [Source:HGNC Symbol;Acc:HGNC:17283]	RIMS2	9699	protein_coding	3.42951	0.0448
ENSG00000166313	ENSP00000374556	amyloid beta precursor protein binding family B member 1 [Source:HGNC Symbol;Acc:HGNC:581]	APBB1	322	protein_coding	3.44375	0.00675
ENSG00000124678	ENSP00000244645	t-complex 11 [Source:HGNC Symbol;Acc:HGNC:11658]	TCP11	6954	protein_coding	3.58747	0.00075
ENSG00000137752	ENSP00000492493	caspase 1 [Source:HGNC Symbol;Acc:HGNC:1499]	CASP1	834	protein_coding	3.70097	0.01455
ENSG00000197635	ENSP00000486421	dipeptidyl peptidase 4 [Source:HGNC Symbol;Acc:HGNC:3009]	DPP4	1803	protein_coding	3.81815	0.0486
ENSG00000243069	-	ARHGEF26 antisense RNA 1 [Source:HGNC Symbol;Acc:HGNC:41048]	ARHGEF26-AS1	100507524	processed_transcript	3.86295	0.0376
ENSG00000272398	ENSP00000475625	CD24 molecule [Source:HGNC Symbol;Acc:HGNC:1645]	CD24	100133941	protein_coding	4.05362	0.0016
ENSG00000101489	ENSP00000410584	CUGBP Elav-like family member 4 [Source:HGNC Symbol;Acc:HGNC:14015]	CELF4	56853	protein_coding	4.14423	0.0028
ENSG00000156510	-	hexokinase domain containing 1 [Source:HGNC Symbol;Acc:HGNC:23302]	HKDC1	80201	protein_coding	4.41369	0.0143
ENSG00000142583	ENSP00000465285	solute carrier family 2 member 5 [Source:HGNC Symbol;Acc:HGNC:11010]	SLC2A5	6518	protein_coding	4.50392	0.0236
ENSG00000275216	-	-	AL161431.1	-	lincRNA	4.76947	0.01375
ENSG00000136250	ENSP00000484305	acyloxyacyl hydrolase [Source:HGNC Symbol;Acc:HGNC:548]	AOAH	313	protein_coding	5.07411	0.03445
ENSG00000204209	ENSP00000482399	death domain associated protein [Source:HGNC Symbol;Acc:HGNC:2681]	DAXX	1616	protein_coding	5.23087	0.0313
ENSG00000109625	ENSP00000371920	carboxypeptidase Z [Source:HGNC Symbol;Acc:HGNC:2333]	CPZ	8532	protein_coding	5.56496	0.0402
ENSG00000176697	ENSP00000389564	brain derived neurotrophic factor [Source:HGNC Symbol;Acc:HGNC:1033]	BDNF	627	protein_coding	5.59655	0.0041
ENSG00000166206	ENSP00000481004	gamma-aminobutyric acid type A receptor beta3 subunit [Source:HGNC Symbol;Acc:HGNC:4083]	GABRB3	2562	protein_coding	5.77435	0.00065
ENSG00000174640	-	solute carrier organic anion transporter family member 2A1 [Source:HGNC Symbol;Acc:HGNC:10955]	SLCO2A1	6578	protein_coding	6.91073	0.0332
ENSG00000284057	ENSP00000492220	-	AP001273.2	-	protein_coding	15.196	0.04625
ENSG00000196335	-	serine/threonine kinase 31 [Source:HGNC Symbol;Acc:HGNC:11407]	STK31	56164	protein_coding	15.3037	0.00885
ENSG00000105141	-	caspase 14 [Source:HGNC Symbol;Acc:HGNC:1502]	CASP14	23581	protein_coding	15.9631	0.001
ENSG00000249884	ENSP00000392995	RNF103-CHMP3 readthrough [Source:HGNC Symbol;Acc:HGNC:38847]	RNF103-CHMP3	100526767	protein_coding	16.1321	0.0495
ENSG00000154678	-	phosphodiesterase 1C [Source:HGNC Symbol;Acc:HGNC:8776]	PDE1C	5137	protein_coding	16.1995	0.0041
ENSG00000231605	-	long intergenic non-protein coding RNA 1363 [Source:HGNC Symbol;Acc:HGNC:50598]	LINC01363	-	antisense	16.5159	0.03275
ENSG00000177459	ENSP00000440297	glutamate rich 5 [Source:HGNC Symbol;Acc:HGNC:26823]	ERICH5	203111	protein_coding	17.082	0.0003
ENSG00000260549	-	metallothionein 1L, pseudogene [Source:HGNC Symbol;Acc:HGNC:7404]	MT1L	4500	transcribed_unitary_pseudogene	19.8865	0.0007
