# Supplementary material for: ACKT: A Proposal for a Novel Score to Predict Prolonged Mechanical Ventilation after Surgical Treatment of Meningioma in Geriatric Patients
Source: MDPI journal article supplement (doi:10.3390/cancers13010098), 2020-12-31
Supplement: s2 [file s2 › 2. 123120 Supplementary Table S2 Protein gene list.xlsx]

## Sheet: Supp Tab 2 protein
Supplementary Table 2. List of proteins differentially expressed in the H1975-MS355 cells
Accession No.		Protein name	Gene name	MW (kDa)	Sequence coverage (%)	No. of unique peptides	No. of total peptides	No. of total spectra	Protein ratio of H1975-MS35/H1975
UniProt	Swiss-Prot								117/114a			117/115a
									ratio	spectra	variability (%)	ratio	spectra	variability (%)
Up-regulated protein in H1975-MS35 cells
Q8NFK1	CXG3_HUMAN	Gap junction gamma-3 protein	GJC3	31.2793	25.81	5	5	14	9.50689	5	161.407	6.54268	5	44.617
Q9Y6U3	ADSV_HUMAN	Adseverin	SCIN	80.4384	23.08	10	10	22	6.49955	8	52.4753	5.35053	9	36.9949
P45452	MMP13_HUMAN	Collagenase 3	MMP13	53.7855	11.46	4	4	9	4.78538	7	44.1906	3.40493	7	36.098
Q9UMD9	COHA1_HUMAN	Collagen alpha-1(XVII) chain	COL17A1	150.326	11.02	10	10	17	4.52472	8	22.2086	3.7751	8	52.1691
P29034	S10A2_HUMAN	Protein S100-A2	S100A2	11.1094	27.55	5	5	10	4.14718	6	18.7801	4.78735	6	18.2433
P82970	HMGN5_HUMAN	High mobility group nucleosome-binding domain-containing protein 5	HMGN5	31.5059	12.06	3	3	5	3.76946	2	7.08355	3.20042	2	7.54724
P13928	ANXA8_HUMAN	Annexin A8	ANXA8	36.8576	63.3	17	17	79	3.60067	26	44.2397	4.88223	25	45.3864
Q96BW9	TAM41_HUMAN	Phosphatidate cytidylyltransferase, mitochondrial	TAMM41	51.0337	7.74	2	2	3	3.24892	2	67.3134	1.73913	2	49.4973
Q5VYY1	ANR22_HUMAN	Ankyrin repeat domain-containing protein 22	ANKRD22	21.8344	7.85	2	2	6	2.80048	3	10.415	3.84702	3	17.2984
P08243	ASNS_HUMAN	Asparagine synthetase [glutamine-hydrolyzing]	ASNS	64.3286	61.5	27	27	137	2.61183	60	57.4493	2.85846	66	55.4327
Q16880	CGT_HUMAN	2-hydroxyacylsphingosine 1-beta-galactosyltransferase	UGT8	61.3985	18.67	9	9	29	2.59998	15	54.5927	2.903	14	33.2988
P47895	AL1A3_HUMAN	Aldehyde dehydrogenase family 1 member A3	ALDH1A3	56.0728	17.19	5	7	15	2.4859	5	15.2612	2.7552	5	29.8616
P09668	CATH_HUMAN	Pro-cathepsin H	CTSH	37.369	18.81	3	3	5	2.46881	4	14.5162	2.76176	4	6.11103
Q9ULW8	PADI3_HUMAN	Protein-arginine deiminase type-3	PADI3	74.6952	4.97	2	2	2	2.45305	2	55.983	1.92106	2	9.77335
Q8NBI6	XXLT1_HUMAN	Xyloside xylosyltransferase 1	XXYLT1	43.7784	13.99	4	4	6	2.43963	4	32.6953	2.21026	5	42.9569
Q9H6N6	MYH16_HUMAN	Putative uncharacterized protein MYH16	MYH16	128.211	24.61	22	22	37	2.36361	19	32.941	1.92271	20	28.6454
Q02388	CO7A1_HUMAN	Collagen alpha-1(VII) chain	COL7A1	295.041	5.71	10	10	13	2.33778	7	36.093	2.36087	8	14.2519
P05121	PAI1_HUMAN	Plasminogen activator inhibitor 1	SERPINE1	45.031	48.76	13	13	54	2.33569	23	42.4177	2.16943	29	35.6399
P54760	EPHB4_HUMAN	Ephrin type-B receptor 4	EPHB4	108.201	24.72	18	19	39	2.22873	23	29.5673	2.02572	21	22.0071
O00625	PIR_HUMAN	Pirin	PIR	32.0933	44.48	9	9	34	2.22276	14	29.2426	2.18827	16	24.7837
Q99985	SEM3C_HUMAN	Semaphorin-3C	SEMA3C	85.1526	2.8	2	2	2	2.18051	2	45.5567	2.65688	2	13.9766
Q9UHR4	BI2L1_HUMAN	Brain-specific angiogenesis inhibitor 1-associated protein 2-like protein 1	BAIAP2L1	56.8471	44.81	22	22	65	2.13811	40	44.8751	1.93028	39	29.5342
Q9BZQ8	NIBAN_HUMAN	Protein Niban	FAM129A	103.07	19.94	9	9	19	2.13344	8	113.353	2.46624	8	87.3884
P00749	UROK_HUMAN	Urokinase-type plasminogen activator	PLAU	48.4757	21.58	7	7	21	2.08403	12	27.1003	1.76397	12	19.1346
O14896	IRF6_HUMAN	Interferon regulatory factor 6	IRF6	53.0956	38.12	13	13	42	2.05205	20	40.3432	2.27178	16	26.5886
P50416	CPT1A_HUMAN	Carnitine O-palmitoyltransferase 1, liver isoform	CPT1A	88.3107	27.04	16	16	31	2.04098	19	36.8845	2.16543	16	40.4421
Q13938	CAYP1_HUMAN	Calcyphosin	CAPS	20.9543	26.46	5	5	12	2.01609	5	11.3257	1.89796	6	13.7995
P16144	ITB4_HUMAN	Integrin beta-4	ITGB4	202.039	28.38	36	36	88	2.01556	41	35.9775	2.17714	38	29.3519
Q16527	CSRP2_HUMAN	Cysteine and glycine-rich protein 2	CSRP2	20.9399	20.73	3	3	7	2.01264	4	27.7989	2.00578	4	18.5403
Q8IYJ3	SYTL1_HUMAN	Synaptotagmin-like protein 1	SYTL1	61.8192	8.72	3	3	6	2.01164	3	3.04808	4.22475	3	2.90946
Q9UH17	ABC3B_HUMAN	DNA dC->dU-editing enzyme APOBEC-3B	APOBEC3B	45.8941	25.13	6	6	9	1.97802	6	14.7269	1.85833	7	55.0695
Q8N4X5	AF1L2_HUMAN	Actin filament-associated protein 1-like 2	AFAP1L2	91.2431	27.38	18	18	43	1.96185	22	21.9734	2.22375	23	33.6943
Q16787	LAMA3_HUMAN	Laminin subunit alpha-3	LAMA3	366.414	4.95	11	11	19	1.96046	10	19.4215	1.85443	10	19.0811
Q00653	NFKB2_HUMAN	Nuclear factor NF-kappa-B p100 subunit	NFKB2	96.6889	31	20	20	42	1.93393	22	26.3018	1.69435	23	24.6205
Q9NYQ8	FAT2_HUMAN	Protocadherin Fat 2	FAT2	479.018	0.69	2	2	2	1.92692	2	53.4848	2.13076	2	47.0835
P30530	UFO_HUMAN	Tyrosine-protein kinase receptor UFO	AXL	98.273	4.81	3	3	3	1.92539	2	48.7243	1.77275	3	30.6667
O43772	MCAT_HUMAN	Mitochondrial carnitine/acylcarnitine carrier protein	SLC25A20	32.9221	12.96	3	3	3	1.90778	2	28.0466	1.81634	2	22.4905
O60313	OPA1_HUMAN	Dynamin-like 120 kDa protein, mitochondrial	OPA1	111.561	45.42	34	34	116	1.90333	60	41.0534	1.84153	63	28.4024
Q9H7F0	AT133_HUMAN	Probable cation-transporting ATPase 13A3	ATP13A3	137.953	8.65	6	6	14	1.87741	6	63.086	1.69133	9	11.3371
Q9NZ08	ERAP1_HUMAN	Endoplasmic reticulum aminopeptidase 1	ERAP1	107.166	13.82	11	11	17	1.87464	12	28.3146	1.84995	12	17.08
P13747	HLAE_HUMAN	HLA class I histocompatibility antigen, alpha chain E	HLA-E	40.1318	15.92	2	4	7	1.87386	2	16.7679	1.73606	3	33.9272
Q8IUF8	RIOX2_HUMAN	Ribosomal oxygenase 2	RIOX2	52.767	23.66	8	8	18	1.86461	11	42.7459	1.72161	10	19.8108
P08069	IGF1R_HUMAN	Insulin-like growth factor 1 receptor	IGF1R	154.693	1.54	2	2	2	1.85348	2	26.5738	1.71098	2	9.4145
P16402	H13_HUMAN	Histone H1.3	HIST1H1D	22.3363	34.84	3	13	51	1.85109	6	9.44262	1.81777	6	12.2269
P18564	ITB6_HUMAN	Integrin beta-6	ITGB6	85.8793	6.6	4	4	10	1.83535	4	25.9521	2.37428	3	31.3255
P41240	CSK_HUMAN	Tyrosine-protein kinase CSK	CSK	50.6717	46.67	15	15	41	1.83316	21	25.8185	1.83261	18	26.9018
Q96P16	RPR1A_HUMAN	Regulation of nuclear pre-mRNA domain-containing protein 1A	RPRD1A	35.6976	21.15	2	6	20	1.82851	2	11.6345	1.99514	2	12.7038
Q86YQ8	CPNE8_HUMAN	Copine-8	CPNE8	63.0677	5.32	2	3	7	1.82646	2	6.54219	2.06418	2	25.243
Q96QD8	S38A2_HUMAN	Sodium-coupled neutral amino acid transporter 2	SLC38A2	55.9895	7.31	2	2	6	1.82616	3	25.592	1.86333	2	101.911
P30044	PRDX5_HUMAN	Peroxiredoxin-5, mitochondrial	PRDX5	22.0725	55.61	9	9	54	1.80394	33	55.5379	1.95675	30	44.9973
P50281	MMP14_HUMAN	Matrix metalloproteinase-14	MMP14	65.852	12.37	6	6	19	1.80132	10	31.7638	1.86007	11	66.1444
Q9Y6N5	SQOR_HUMAN	Sulfide:quinone oxidoreductase, mitochondrial	SQOR	49.9289	18.22	8	8	13	1.78958	8	50.8484	2.00857	8	11.1936
Q9UNN8	EPCR_HUMAN	Endothelial protein C receptor	PROCR	26.6546	20.59	4	4	6	1.78713	4	18.9284	3.18681	4	57.8422
P53701	CCHL_HUMAN	Cytochrome c-type heme lyase	HCCS	30.5818	33.21	6	6	12	1.78288	8	17.0083	1.80054	8	31.0085
Q02487	DSC2_HUMAN	Desmocollin-2	DSC2	99.8987	4.44	3	3	4	1.77306	3	24.411	1.88575	3	20.8878
P29373	RABP2_HUMAN	Cellular retinoic acid-binding protein 2	CRABP2	15.683	51.45	6	6	25	1.76445	14	25.7553	1.70039	13	24.1235
Q9HBH0	RHOF_HUMAN	Rho-related GTP-binding protein RhoF	RHOF	23.6102	12.8	3	3	5	1.7468	3	13.9625	2.10322	3	3.07628
Q56VL3	OCAD2_HUMAN	OCIA domain-containing protein 2	OCIAD2	16.9426	38.31	4	4	16	1.7236	8	46.1891	2.0835	7	19.2523
Q92673	SORL_HUMAN	Sortilin-related receptor	SORL1	248.267	2.17	4	4	6	1.71149	4	25.7428	2.13995	3	17.7347
Q9H173	SIL1_HUMAN	Nucleotide exchange factor SIL1	SIL1	52.052	9.33	4	4	6	1.70847	3	7.15209	1.90727	3	11.7787
Q9BPZ3	PAIP2_HUMAN	Polyadenylate-binding protein-interacting protein 2	PAIP2	14.9749	38.58	2	2	5	1.70842	3	12.8204	2.31905	2	42.8185
P23229	ITA6_HUMAN	Integrin alpha-6	ITGA6	126.526	18.14	17	17	44	1.70095	24	41.238	1.90229	24	22.765
Q15646	OASL_HUMAN	2'-5'-oligoadenylate synthase-like protein	OASL	59.1887	24.32	7	7	17	1.69263	9	31.6106	2.02648	9	25.1397
Q8WUP2	FBLI1_HUMAN	Filamin-binding LIM protein 1	FBLIM1	40.6427	8.58	3	3	6	1.66427	2	7.62258	2.01396	2	2.14108
Q04828	AK1C1_HUMAN	Aldo-keto reductase family 1 member C1	AKR1C1	36.765	21.05	6	6	9	1.65343	6	18.1051	2.02126	6	14.2573
P41223	BUD31_HUMAN	Protein BUD31 homolog	BUD31	16.9886	55.56	8	8	16	1.64589	8	43.0371	2.56514	9	21.8403
Down-regulated protein in H1975-MS35 cells
P50479	PDLI4_HUMAN	PDZ and LIM domain protein 4	PDLIM4	35.3757	21.21	5	5	11	0.393599	7	25.578	0.364267	7	30.2225
P53602	MVD1_HUMAN	Diphosphomevalonate decarboxylase	MVD	43.3772	18.25	5	5	14	0.391645	7	51.5241	0.379822	7	24.1583
P15104	GLNA_HUMAN	Glutamine synthetase	GLUL	42.0373	16.09	4	4	9	0.371948	5	97.3142	0.385985	5	40.8547
Q9BVA1	TBB2B_HUMAN	Tubulin beta-2B chain	TUBB2B	49.9209	67.19	2	24	405	0.361548	3	88.8053	0.370325	3	7.41607
P21266	GSTM3_HUMAN	Glutathione S-transferase Mu 3	GSTM3	26.5421	32.89	6	6	15	0.290544	9	32.0991	0.298229	9	31.7593
P52566	GDIR2_HUMAN	Rho GDP-dissociation inhibitor 2	ARHGDIB	22.9736	28.86	3	3	4	0.280643	3	17.1515	0.316965	3	21.0056
Q9BQ13	KCD14_HUMAN	BTB/POZ domain-containing protein KCTD14	KCTD14	29.572	18.82	3	3	4	0.228056	4	14.6314	0.299188	4	49.3743
P80404	GABT_HUMAN	4-aminobutyrate aminotransferase, mitochondrial	ABAT	56.4026	15	6	6	14	0.211108	3	2.25904	0.250257	3	4.87669
P40261	NNMT_HUMAN	Nicotinamide N-methyltransferase	NNMT	29.5551	26.89	5	5	11	0.205614	4	23.4475	0.145297	4	34.2369
Q2TB90	HKDC1_HUMAN	Putative hexokinase HKDC1	HKDC1	102.478	8.18	4	7	11	0.170799	3	21.0027	0.166025	4	26.7839
P12277	KCRB_HUMAN	Creatine kinase B-type	CKB	42.6173	40.68	10	10	27	0.1155	10	59.2134	0.0914879	9	46.0193
aProteins with ratios larger than the mean plus two SD (1.6427 and 1.6783 for 117/114 and 117/115, respectively) are defined as up-regulated. Proteins with ratios smaller than the mean minus one SD (0.4132 and 0.3898 for 117/114 and 117/115, respectively) are defined as down-regulated. Only the proteins differentially displayed in the two sets are considered as potential candidates that are diffe…
